# Supplementary material for: Nucleophilic trifluoromethylation of cyclic imides using (trifluoromethyl)trimethylsilane CF3SiMe3
Source: Royal Society of Chemistry journal article supplement (doi:10.1039/b407555b), 2004-01-01
Supplement: b407555b.doc [file b407555b.doc]

# Supplementary data

## Nucleophilic trifluoromethylation of cyclic imides using (trifluoromethyl)trimethylsilane CF3SiMe3†

Anja Hoffmann-Röder, Paul Seilerand François Diederich***

*Laboratorium für Organische Chemie, ETH-Hönggerberg, CH-8093 Zürich, Switzerland.*

*E-mail:* [*diederich@org.chem.ethz.ch*](mailto:diederich@org.chem.ethz.ch)

**Synthesis ESI**

Synthesis of **2**:

To a solution of **1** (237 mg, 1.00 mmol) in dry THF (10 cm3) under N2 at 0 °C, CF3SiMe3 (284 mg, 2.00 mmol) and TBAF3H2O (32 mg, 10 mol-%) were added sequentially. The resulting suspension was stirred for 4 h at 0 °C and slowly warmed to room temperature over a period of 1 h. TBAF (1 M in THF, 2.0 cm3, 2.00 mmol) was added and after 30 min of additional stirring, the mixture was hydrolysed with 2 M HCl (15 cm3) and extracted with EtOAc (3 x 10 cm3). The organic layers were washed with 1 M HCl (10 cm3) and saturated aqueous NaCl solution (10 cm3), dried (MgSO4) and concentrated *in vacuo*. Purification of the resulting residue by flash column chromatography (SiO2; hexanes/EtOAc 3:1) afforded **2** (293 mg, 95%) as a white solid, mp 105-107 °C;**H(300 MHz, CDCl3) 7.86-7.83 (1 H, m), 7.74-7.66 (3 H, m), 7.46-7.37 (5 H, m), 6.11 (1 H, br s), 4.82 (1 H, d, *J* 15.9), 4.66 (1 H, d, *J* 15.9); **C(75 MHz, CDCl3) 169.0, 140.6, 136.8, 133.0, 131.1, 130.8, 128.2, 128.0, 127.2, 123.8, 123.5, 122.8 (q, *J* 285), 87.9 (q, *J* 33), 43.1; **F(282 MHz, CDCl3) -78.8; HR-FT-MALDI-MS (DHB) calcd for C16H13F3NO2+ (*M*H+): 308.0898; found: 308.0891.

Synthesis of **12**:

To a solution of **11** (178 mg, 0.83 mmol) in dry THF (10 cm3) under N2, CsF (30 mg, 20 mol-%) and CF3SiMe3 (430 mg, 3.00 mmol) were added sequentially. The resulting suspension was stirred for 16 h at room temperature. TBAF (1 M in THF, 2.0 cm3, 2.00 mmol) was added and after 30 min of additional stirring, the mixture was hydrolysed with 2 M HCl (15 cm3) and extracted with EtOAc (3 x 10 cm3). The organic layers were washed with 1 M HCl (10 cm3) and saturated aqueous NaCl solution (10 cm3), dried (MgSO4) and concentrated *in vacuo*. Purification of the resulting residue by flash column chromatography (SiO2; CH2Cl2/MeOH 40:1) afforded **12** (186 mg, 79%) as a white solid, mp 118-119 °C;**H(300 MHz, CDCl3) 7.35-7.24 (5 H, m), 4.80 (1 H, br s), 4.71 (1 H, d, *J* 15.3), 4.41 (1 H, d, *J* 15.3), 3.19 (1 H, m), 3.00 (1 H, m), 2.45-2.29 (1 H, m), 2.27-2.19 (1 H, m), 2.09-2.02 (1 H, m), 1.95-1.88 (1 H, m); **C(75 MHz, CDCl3) 177.5, 137.3, 128.3, 127.5, 127.1, 123.9 (q, *J* 286), 89.7 (q, *J* 31), 43.7, 40.1, 37.0, 21.9, 19.4; **F(282 MHz, CDCl3) -82.3; HR-EI-MS calcd for C14H14F3NO2+ (*M*+): 285.0977; found: 285.0975.

Synthesis of **20**:

To a solution of **19** (232 mg, 1.00 mmol) in dry THF (10 cm3) under N2, CF3SiMe3 (284 mg, 2.00 mmol) and TMAF (17 mg, 20 mol-%) were added sequentially. The resulting suspension was stirred for 24 h at room temperature. TBAF (1 M in THF, 2.0 cm3, 2.00 mmol) was added and after 30 min of additional stirring, the mixture was hydrolysed with 2 M HCl (15 cm3) and extracted with EtOAc (3 x 10 cm3). The organic layers were washed with 1 M HCl (10 cm3) and saturated aqueous NaCl solution (10 cm3), dried (MgSO4) and concentrated *in vacuo*. Purification of the resulting residue by flash column chromatography (SiO2; CH2Cl2/MeOH 40:1) afforded **2** (83 mg, 28%) as a colourless oil together with imide **1** (125 mg, 54%);**H(300 MHz, CDCl3) 7.36-7.28 (5 H, m), 5.29 (1 H, br s), 4.66 (1 H, d, *J* 15.9), 4.46 (1 H, d, *J* 15.9), 4.02 (1 H, d, *J* 13.2), 3.79 (1 H, d, *J* 13.2), 2.46 (3 H, s); **C(75 MHz, CDCl3) 170.9, 153.5, 136.2, 128.4, 127.9, 127.7, 122.5 (q, *J* 284), 83.2 (q, *J* 33), 49.3, 44.3, 23.5; **F(282 MHz, CDCl3) -81.2; HR-EI-MS calcd for C13H13F3N2O2+ (*M*+): 302.0878; found: 302.0877.

Synthesis of **22**:

To a solution of **21** (230 mg, 0.50 mmol) in dry THF (10 cm3) under N2 at -40 °C, CsF (15 mg, 20 mol-%) and CF3SiMe3 (284 mg, 2.00 mmol) were added sequentially. The resulting suspension was stirred for 4 h at -40 °C and slowly warmed to 10 °C. The mixture was hydrolysed with 2 M HCl (15 cm3) at 0 °C and extracted with EtOAc (3 x 10 cm3). The organic layers were washed with 1 M HCl (10 cm3) and saturated aqueous NaCl solution (10 cm3), dried (MgSO4) and concentrated *in vacuo*. Purification of the resulting residue by flash column chromatography (SiO2; hexanes/EtOAc 2:1) afforded **22** (160 mg, 59%) as a pale yellow solid, mp 174-177 °C; **H(300 MHz, CDCl3) 7.43 (2 H, d, *J* 8.7), 7.30 (1 H, br s), 7.18 (2 H, d, *J* 8.7), 6.85 (1 H, d, *J* 1.5), 6.77 (1 H, dd, *J* 8.1, 1.5), 6.68 (1 H, d, *J* 8.1), 5.89 (2 H, s), 4.38-4.34 (2 H, m), 4.01 (1 H, d, *J* 4.5), 3.00 (1 H, dd, *J* 8.4, 4.2), 2.83 (1 H, d, *J* 8.1), 2.17 (3 H, s), 1.25 (3 H, s), 1.22 (3 H, s); **C(75 MHz, CDCl3) 174.0, 147.1, 146.4, 133.9, 131.0, 130.9, 122.5 (q, *J* 283), 121.8, 121.3, 109.1, 107.6, 100.7, 90.6 (q, *J* 33), 68.3, 61.8, 53.4, 46.3, 43.4, 32.6, 23.7, 22.8; **F(282 MHz, CDCl3) -78.2; HR-FT-MALDI-MS (DHB) calcd for C24H25BrF3N2O4+ (*M*H+): 541.0950; found: 541.0949.

Synthesis of **24**:

To a solution of **23** (235 mg, 0.50 mmol) in dry THF (10 cm3) under N2 at -10 °C, CsF (15 mg, 20 mol-%) and CF3SiMe3 (284 mg, 2.00 mmol) were added sequentially. The resulting suspension was stirred for 3 h at -10 °C and slowly warmed to 0 °C. The mixture was hydrolysed with 2 M HCl (15 cm3) at 0 °C and extracted with EtOAc (3 x 10 cm3). The organic layers were washed with 1 M HCl (10 cm3) and saturated aqueous NaCl solution (10 cm3), dried (MgSO4) and concentrated *in vacuo*. Purification of the resulting residue by flash column chromatography (SiO2; hexanes/EtOAc 3:1) afforded **24** (154 mg, 57%) as a pale yellow solid, mp 181 °C (decomp.); **H(300 MHz, CDCl3) 7.39 (2 H, d, *J* 8.4), 7.05 (2 H, d, *J* 8.4), 6.68-6.66 (3 H, m), 5.93 (2 H, dd, *J* 6.8, 1.4), 4.41 (1 H, d, *J* 15.0), 4.15 (1 H, d, *J* 15.0), 3.91 (1 H, d, *J* 10.8), 3.55 (1 H, dd, *J* 10.8, 6.8), 3.47 (1 H, m), 3.18 (1 H, d, *J* 8.4), 2.98-2.89 (1 H, m), 2.81-2.73 (1 H, m), 2.16-2.01 (2 H, m), 1.89-1.83 (1 H, m), 1.69-1.60 (1 H, m); **C(75 MHz, CDCl3) 172.8, 147.0, 146.4, 135.4, 131.3, 130.7, 129.4, 123.3 (q, *J* 283), 122.0, 121.7, 109.4, 107.5, 100.8, 89.1 (q, *J* 32), 66.3, 66.2, 50.6, 48.1, 45.5, 43.8, 26.9, 26.7, 22.9; **F(282 MHz, CDCl3) -79.3; HR-FAB-MS calcd for C24H24BrF3N2O4+ (*M*H+): 539.0793; found: 539.0843.
